# Supplementary material for: The contribution of wildland fire emissions to deposition in the U S: implications for tree growth and survival in the Northwest
Source: PubMed Central journal article supplement (PMC7970516; doi:10.1088/1748-9326/abd26e), 2021-01-29
Supplement: NIHMS1669185-supplement-Supplement1.pdf [file NIHMS1669185-supplement-Supplement1.pdf]

1 *Supporting Information for:*

2

3 *The contribution of wildland fire emissions to deposition in the U.S.: Implications*  
4 *for tree growth and survival in the Northwest*

5

6 Shannon N. Koplitz<sup>1,†\*</sup>, Christopher G. Nolte<sup>1</sup>, Robert D. Sabo<sup>2</sup>, Christopher M. Clark<sup>2</sup>,  
7 Kevin J. Horn<sup>3</sup>, R. Quinn Thomas<sup>3</sup>, and Tamara A. Newcomer-Johnson<sup>4</sup>

8

9 <sup>1</sup> Center for Environmental Measurement and Modeling, US EPA, Research Triangle Park, NC

10 <sup>2</sup> Center for Public Health and Environmental Assessment, US EPA, Washington, DC

11 <sup>3</sup> Department of Forest Resources and Environmental Conservation, Virginia Tech, Blacksburg,  
12 VA

13 <sup>4</sup> Center for Environmental Measurement and Modeling, US EPA, Cincinnati, OH

14

15

16 \* Corresponding author: Koplitz.shannon@epa.gov

17 † Current address: Office of Air Quality Planning and Standards, US EPA, Research Triangle Park,  
18 NC

19

20

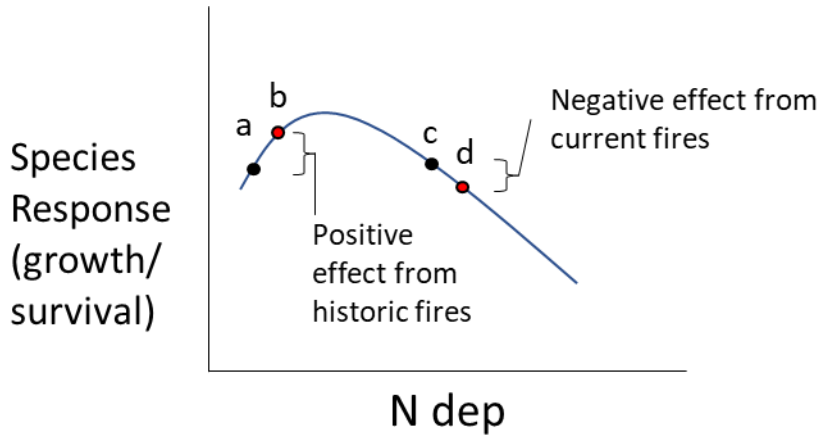

21

22 **Figure S1.** Working hypothesis: N deposition historically from fires was low, and so the  
 23 incremental effect from fire was generally positive (i.e. moving from point a to b). Contemporary  
 24 N deposition is much higher, thus the incremental effect from fire is now negative (i.e. moving  
 25 from point c to d).  
 26

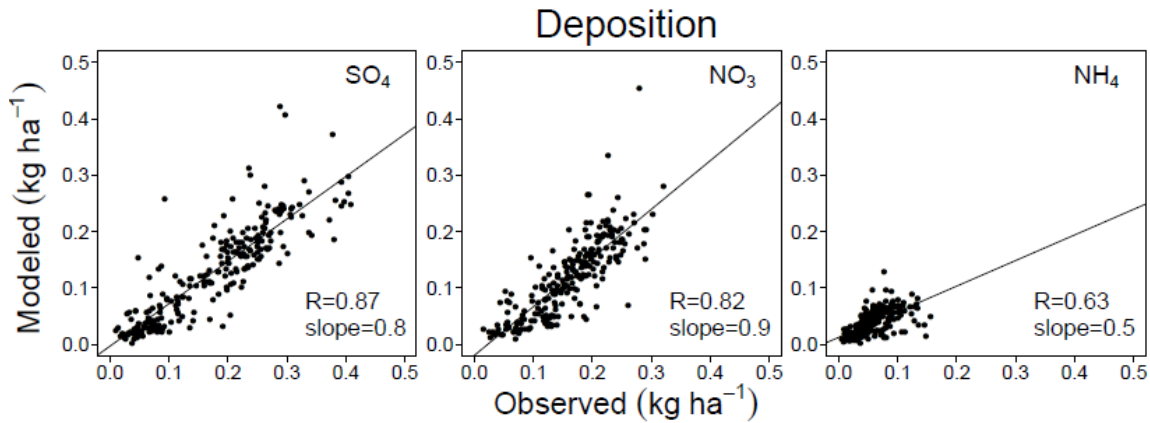

27

28 **Figure S2.** Wet deposition fluxes modeled with CMAQ compared to observed values from NADP during  
 29 2008-2012. Values represent 5-year averages at each NADP monitoring site location. Correlation  
 30 coefficients and slopes for each comparison are shown inset.

31

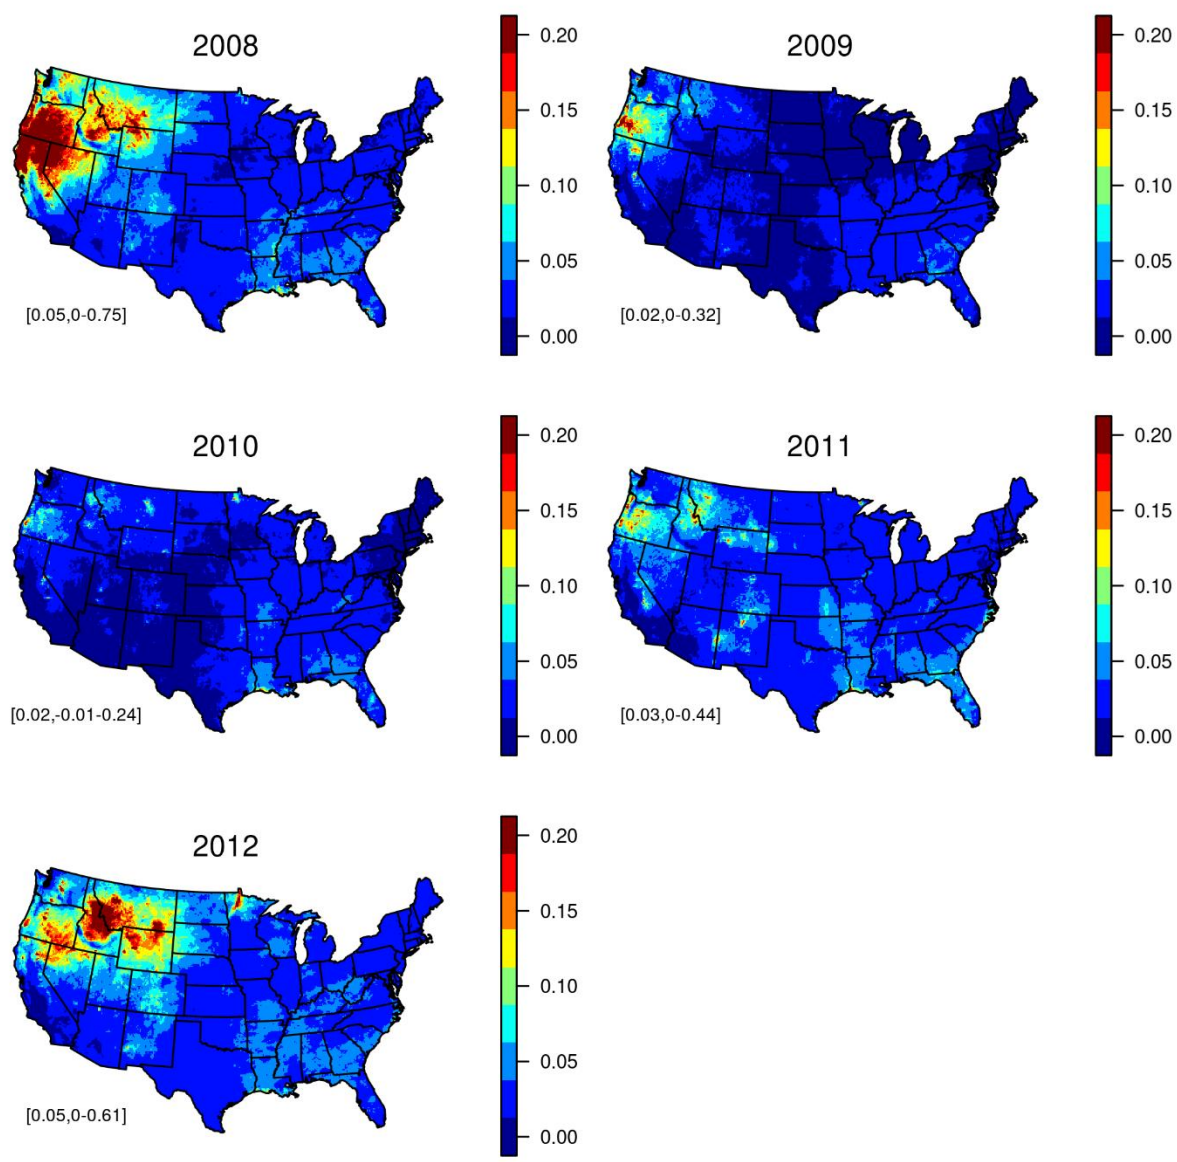

32

33 **Figure S3.** Fraction of total N deposition due to wildland fires during 2008-2012 simulated with  
 34 CMAQ. Domain wide means and ranges are shown inset in brackets.

35

36

37

38

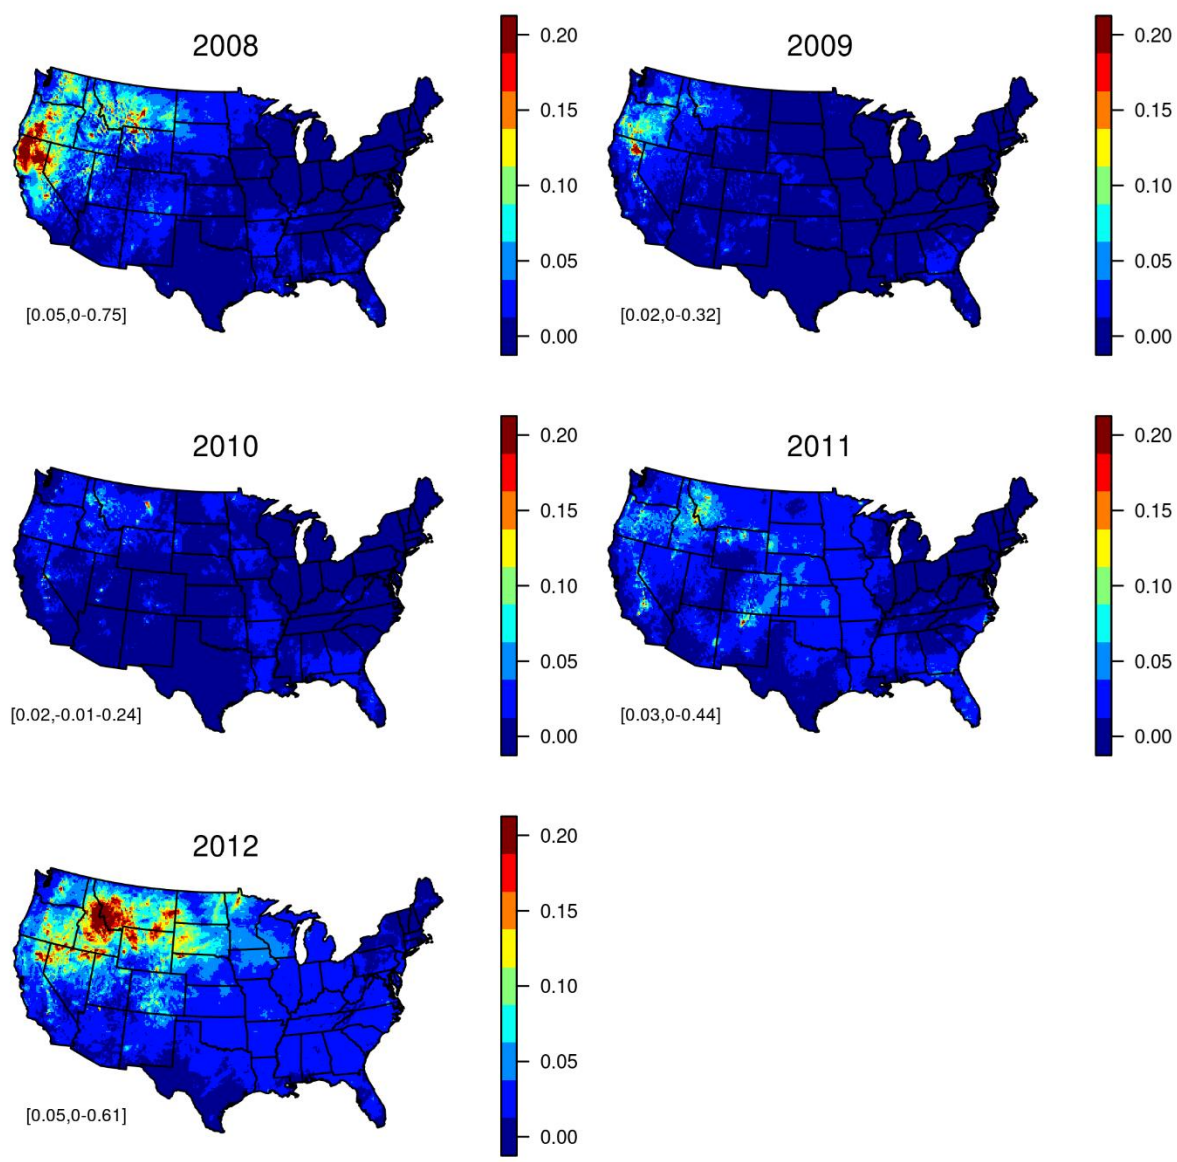

39

40 **Figure S4.** Fraction of total S deposition due to wildland fires during 2008-2012 simulated with  
 41 CMAQ. Domain wide means and ranges are shown inset in brackets.

42

43

44

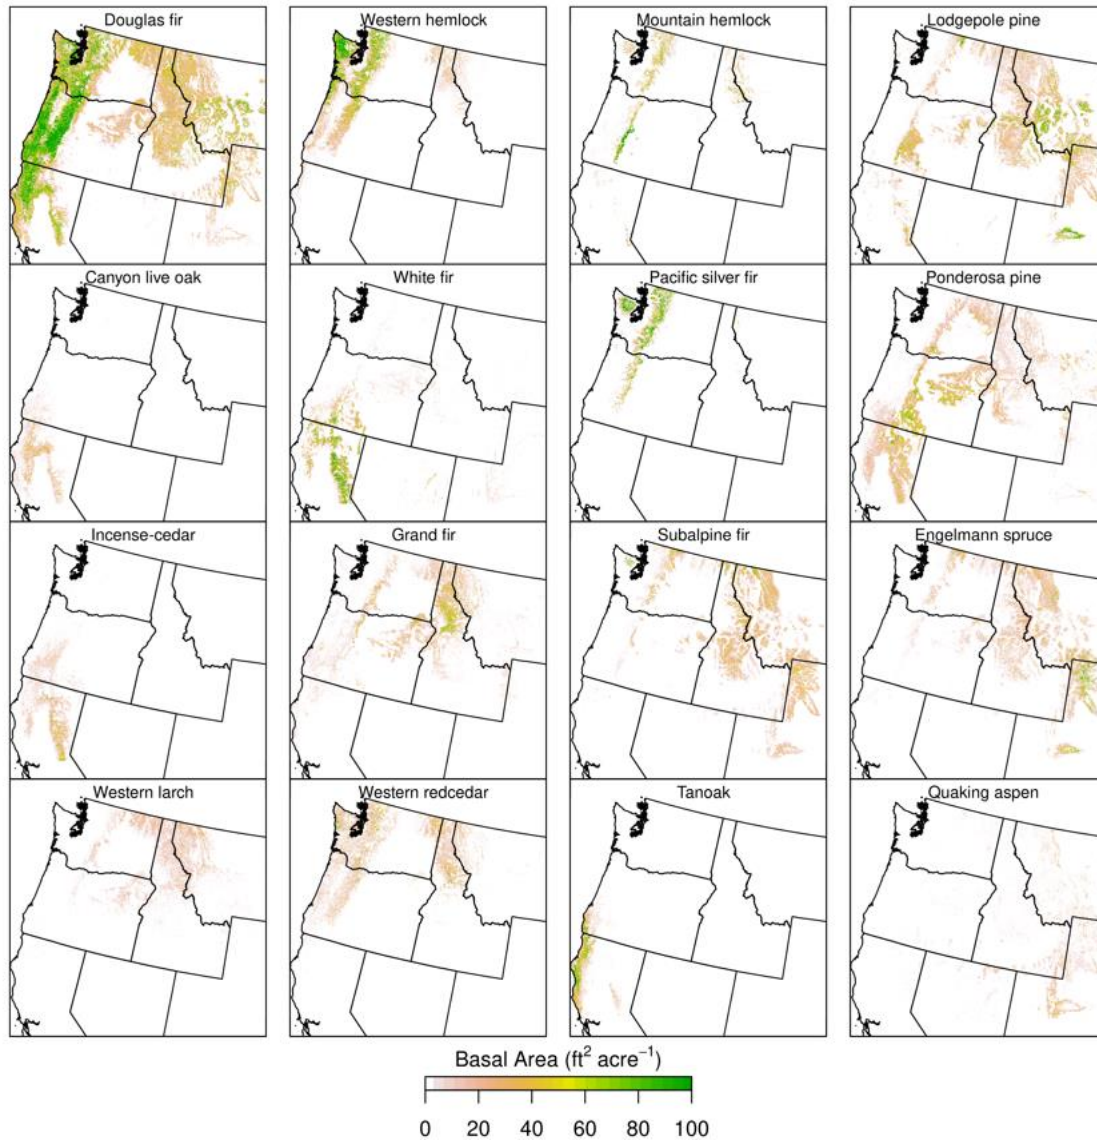

45

46 **Figure S5.** Basal area density distribution for species included in this work. Distributions shown  
 47 here are from Wilson et al. (2013).

48

49 Wilson, B. T., Lister, A. J., Riemann, R. I., & Griffith, D. M. (2013). Live tree species basal area 641 of  
 50 the contiguous United States (2000-2009).
